# Supplementary material
Source: PubMed Central journal article supplement (PMC7484419)
Supplement: NIHMS1617104-supplement-supp_mat.pdf [file NIHMS1617104-supplement-supp_mat.pdf]

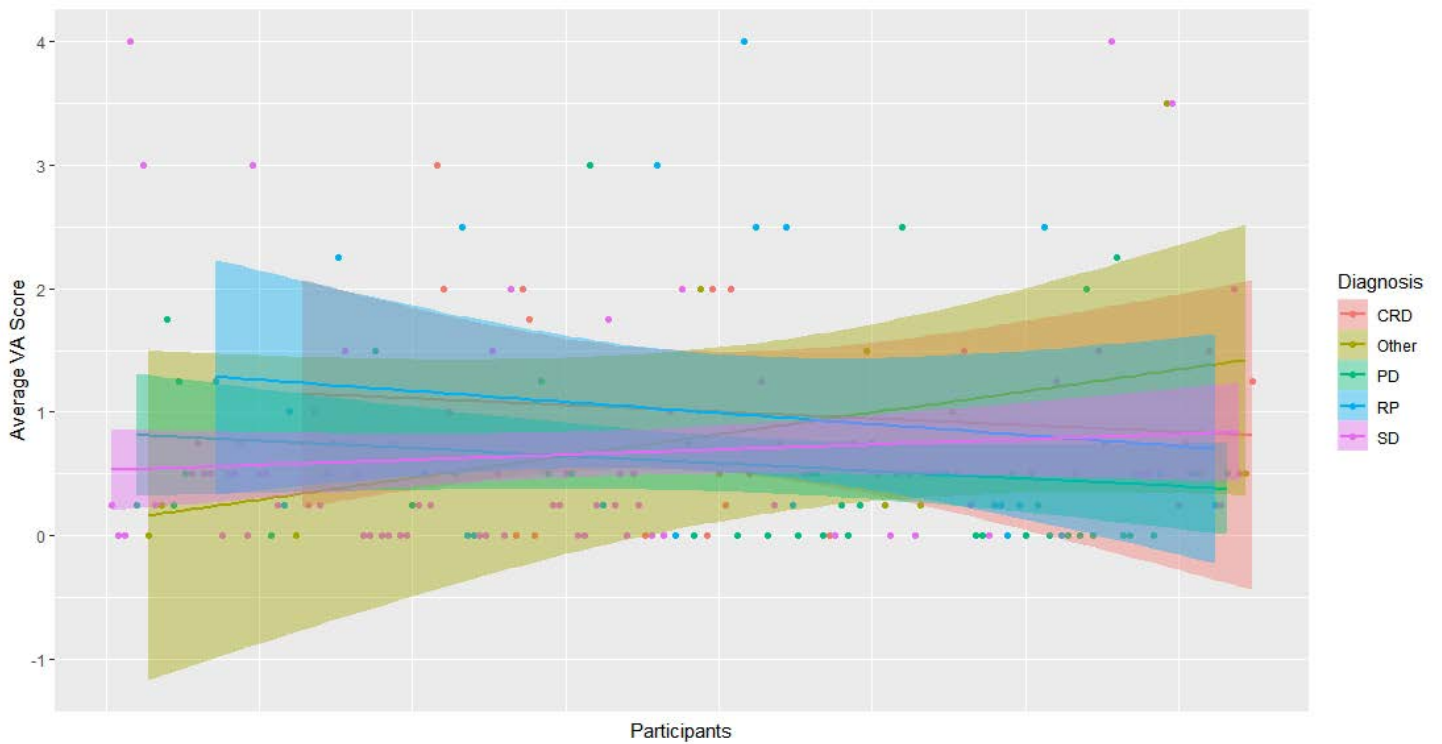

**SUPP. FIGURE S1: Visual Acuity Scoring and Diagnosis**

eyeGENE® Participants Average Visual Acuity Score: Individual participants (indicated by dot) were plotted against average visual acuity score (OD/OS) and color-coded by diagnosis category (Red = Cone rod dystrophy, Gold = Other, Green = Pattern dystrophy, Blue = Retinitis pigmentosa, Purple = Stargardt disease). Figure shows similar visual acuity score range between clinical phenotypes.

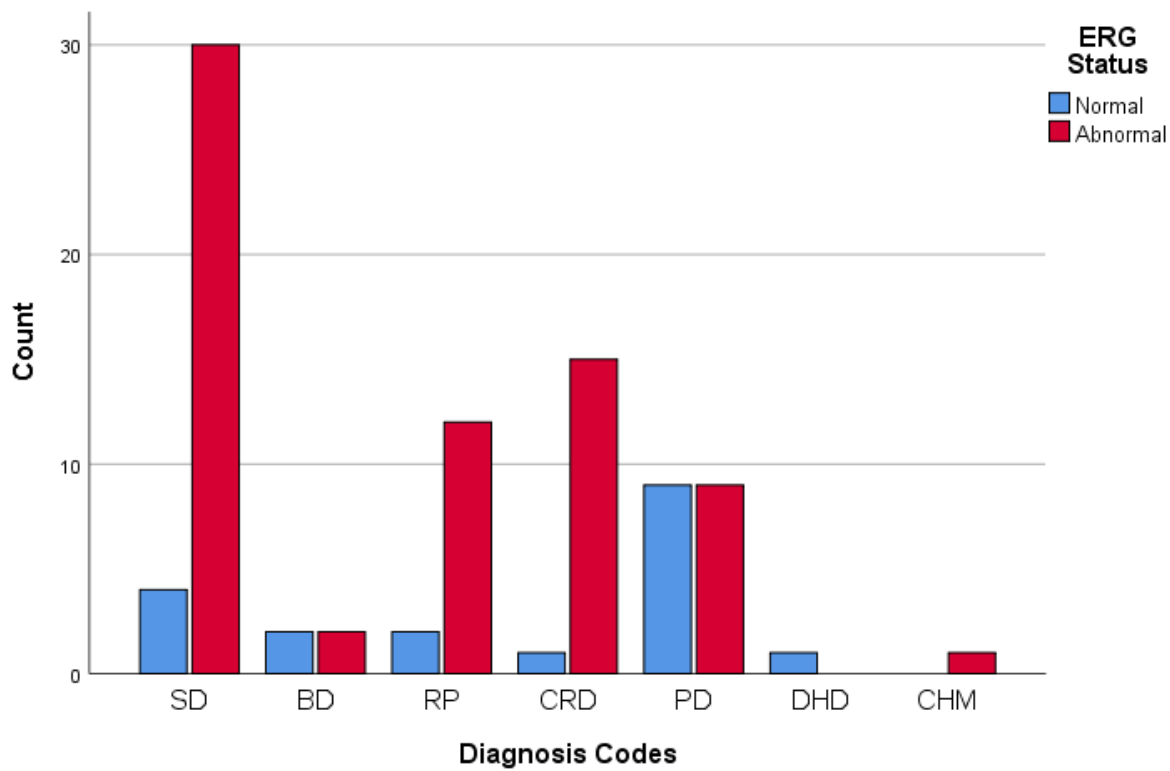

**SUPP. FIGURE S2:** eyeGENE® Participant Breakdown of ERG Status and Diagnosis Category

eyeGENE® Participant Breakdown of ERG Status and Diagnosis Category: Chart showing the number of participants with a normal or abnormal ERG as designated by diagnosis category.

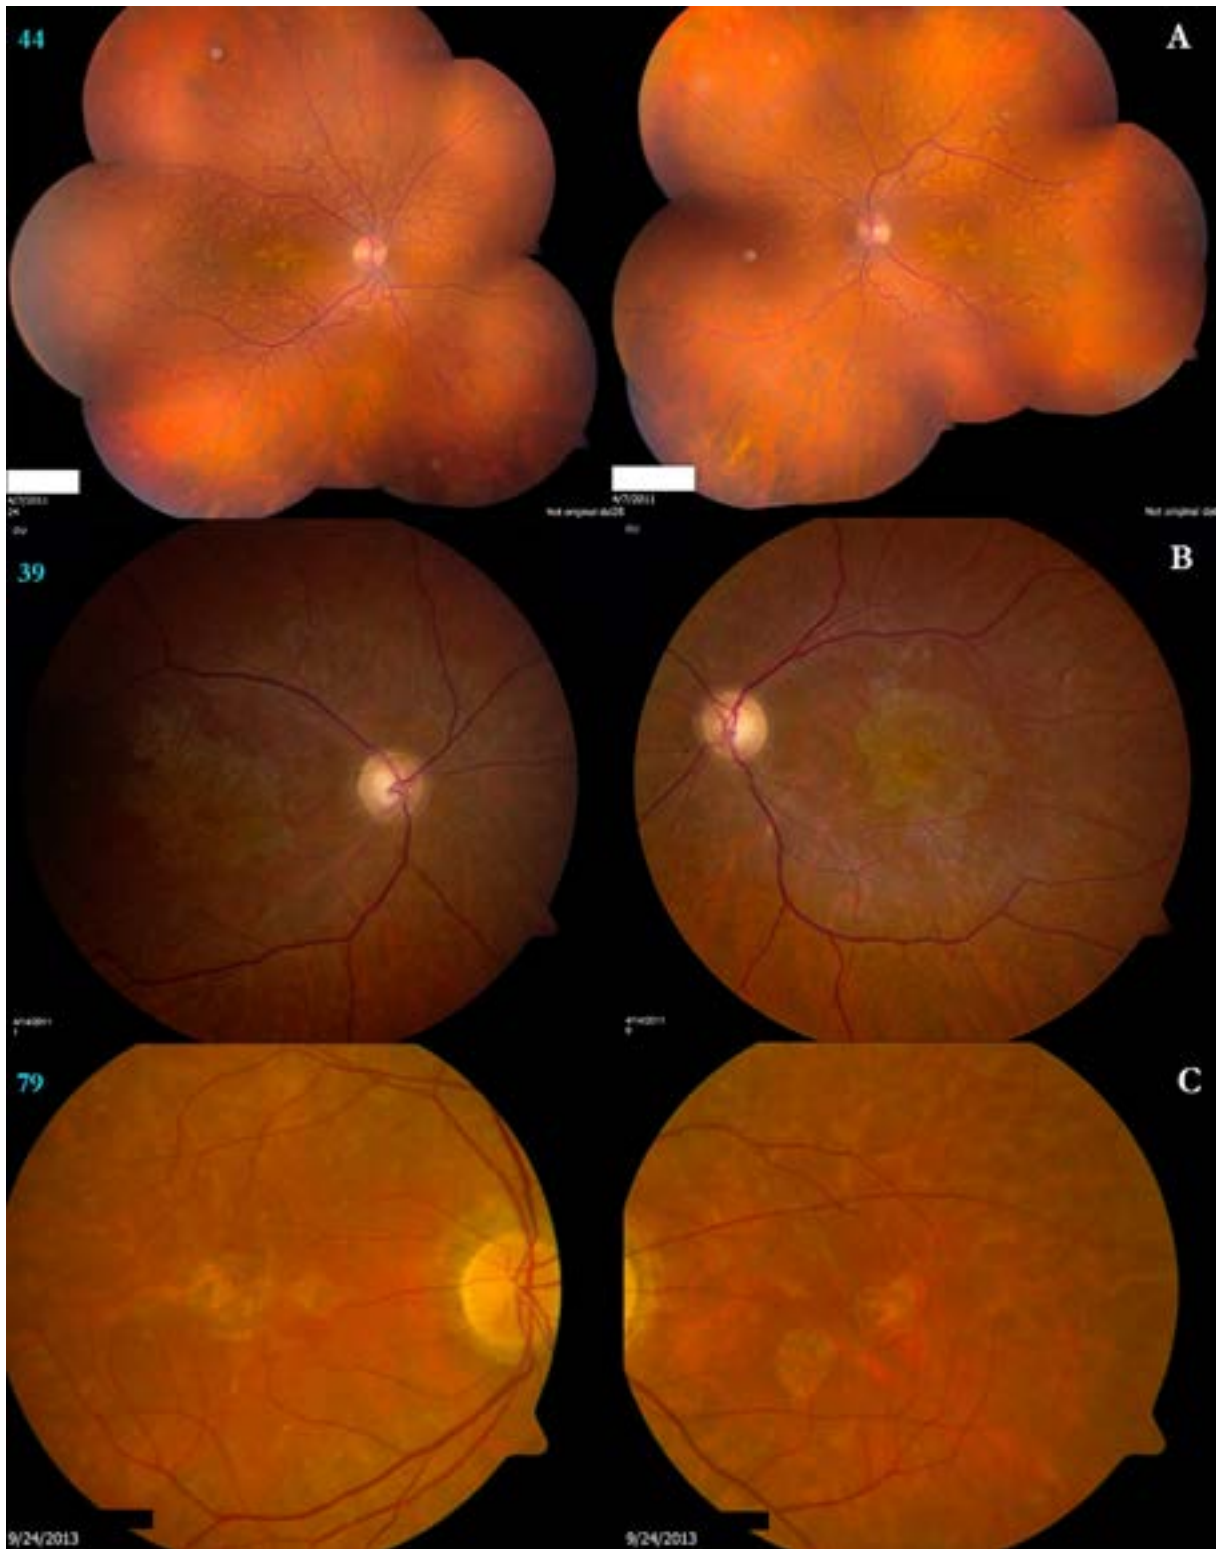

**SUPP. FIGURE S3:** *PRPH2*-positive Fundus Images of Participants 44 (A), 39 (B), and 79 (C)

These fundus images are from participants 44 (A), 39 (B), and 79 (C) who all carry the c.612C>A, p.Tyr204\* variant. Participants 44 and 79 were diagnosed with Pattern dystrophy and participant 39 was diagnosed with Stargardt disease.

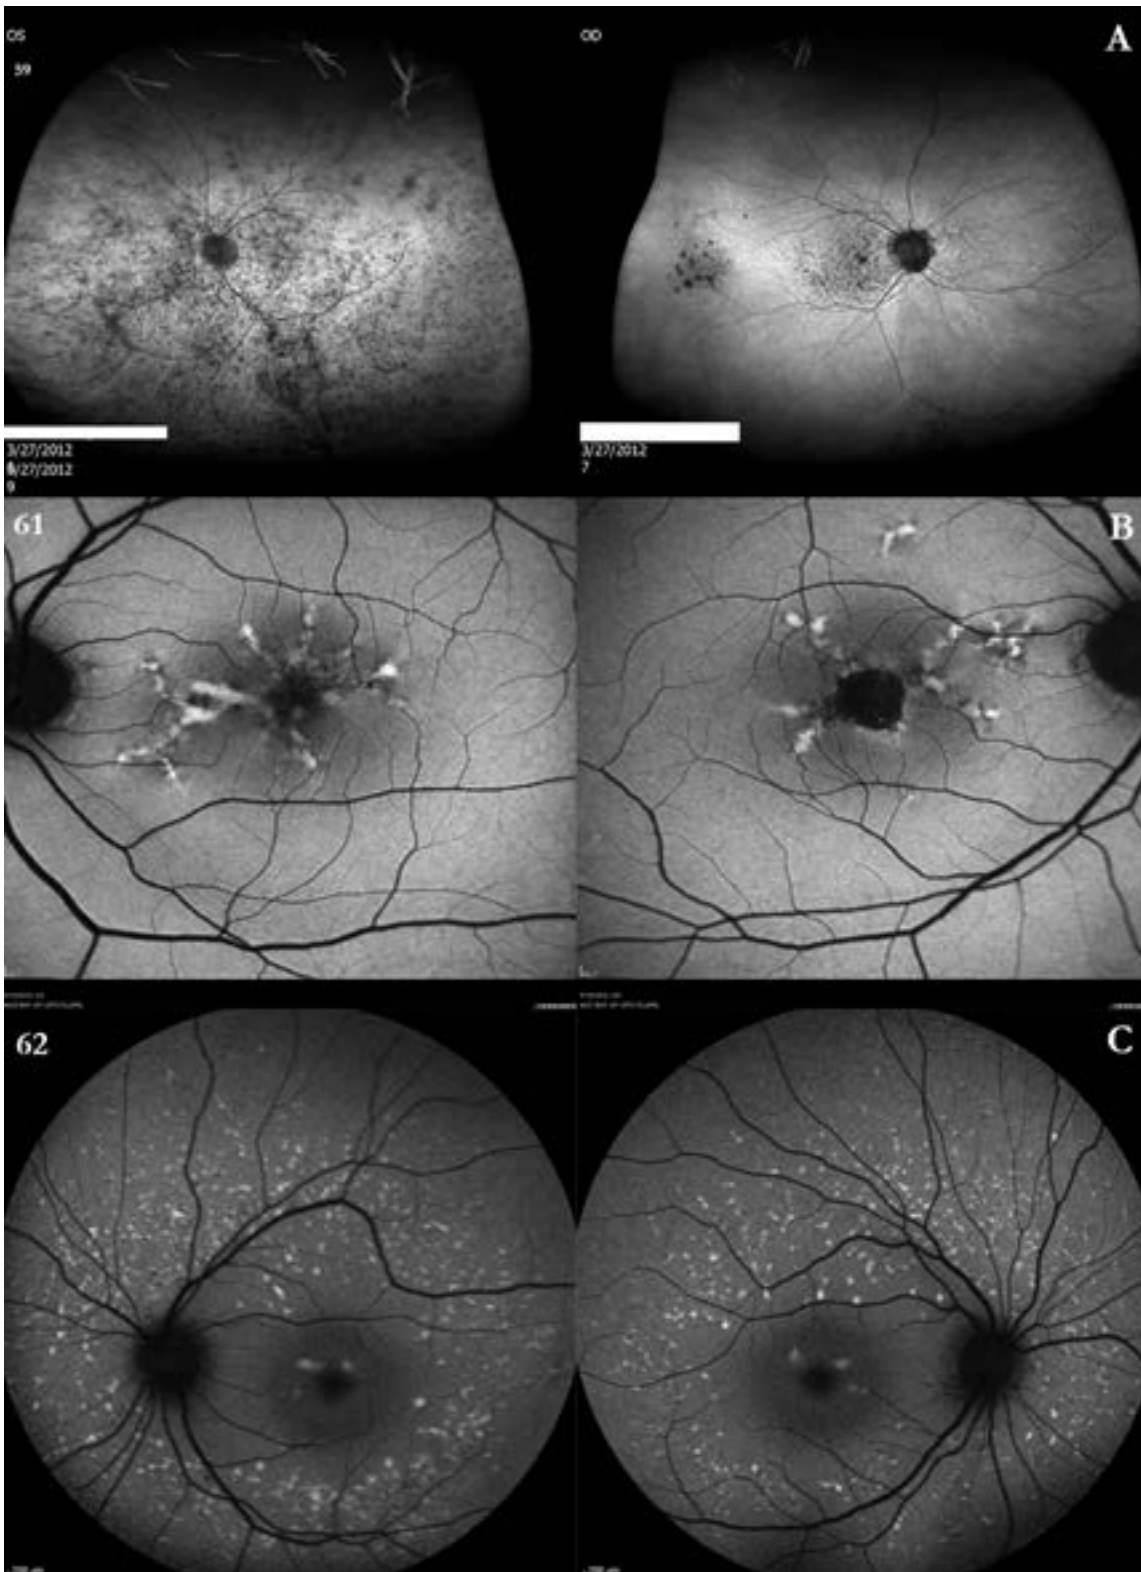

**SUPP. FIGURE S4:** *PRPH2*-positive Autofluorescence Images of Participants 59 (A), 61 (B), and 62 (C)  
These autofluorescence images are from participants 59 (A), 61 (B), and 62 (C) who all carry the c.422A>G, p.Tyr141Cys variant. Participants 59 and 62 were diagnosed with Stargardt disease and participant 61 was diagnosed with Pattern dystrophy.

**SUPP. TABLE S2: Descriptive Statistics Table**

| <b>N = 187</b>             | <b>CRD</b><br>Mean (Range) | <b>Other</b><br>Mean (Range) | <b>PD</b><br>Mean (Range) | <b>SD</b><br>Mean (Range) | <b>RP</b><br>Mean (Range) |
|----------------------------|----------------------------|------------------------------|---------------------------|---------------------------|---------------------------|
| <b>Age at Enrollment</b>   | 47 (12 – 82)               | 51 (32 – 80)                 | 54 (25 – 89)              | 51 (8 – 82)               | 56 (34 – 75)              |
| <b>Age of Onset</b>        | 32 (4 – 65)                | 44 (20 – 73)                 | 45 (10 – 71)              | 39 (0 – 70)               | 34 (10 – 60)              |
| <b>N = 187</b>             | <b>CRD</b><br>N (%)        | <b>Other</b><br>N (%)        | <b>PD</b><br>N (%)        | <b>SD</b><br>N (%)        | <b>RP</b><br>N (%)        |
| <b>Male (N = 91)</b>       | 9 (9.9%)                   | 6 (6.6%)                     | 19 (20.9%)                | 42 (46.2%)                | 15 (16.5%)                |
| <b>Female (N = 96)</b>     | 9 (9.4%)                   | 5 (5.3%)                     | 26 (27.1%)                | 45 (46.9%)                | 11 (11.5%)                |
| <b>Autosomal dominant</b>  | 11 (61.1%)                 | 10 (90.9%)                   | 27 (60.0%)                | 22 (25.3%)                | 23 (88.5%)                |
| <b>Autosomal recessive</b> | 2 (11.1%)                  | 1 (9.1%)                     | 4 (8.9%)                  | 12 (13.8%)                | 1 (3.8%)                  |
| <b>Sporadic</b>            | 4 (22.2%)                  | 0                            | 9 (20.0%)                 | 45 (51.7%)                | 2 (7.7%)                  |
| <b>Unknown</b>             | 1 (5.6%)                   | 0                            | 5 (11.1%)                 | 8 (9.2%)                  | 0                         |

**SUPP. TABLE S4: ERG Data with Diagnosis, Years with Disease, Age at Exam**

| <b>Diagnosis Category</b> | <b>Total</b> |                        |                           |                        |                        |
|---------------------------|--------------|------------------------|---------------------------|------------------------|------------------------|
| <b>Normal ERG</b>         | <b>19</b>    | <b>Avg Years w/Dis</b> | <b>Median Years w/Dis</b> | <b>Avg Age at Exam</b> | <b>Med Age at Exam</b> |
| <b>SD</b>                 | 4            | 12.5                   | 4.5                       | 44.5                   | 47.0                   |
| <b>BD</b>                 | 2            | 7.0                    | 7.0                       | 73.5                   | 73.5                   |
| <b>DHD</b>                | 1            | 0.0                    | 0.0                       | 32.0                   | 32.0                   |
| <b>RP</b>                 | 2            | 6.0                    | 6.0                       | 51.5                   | 51.5                   |
| <b>CRD</b>                | 1            | 2.0                    | 2.0                       | 42.0                   | 42.0                   |
| <b>PD</b>                 | 9            | 7.9                    | 6.0                       | 50.8                   | 52.0                   |
| <b>Abnormal ERG</b>       | <b>68</b>    | <b>Avg Years w/Dis</b> | <b>Median Years w/Dis</b> | <b>Avg Age at Exam</b> | <b>Med Age at Exam</b> |
| <b>SD</b>                 | 29           | 10.3                   | 6.0                       | 55.5                   | 58.0                   |
| <b>BD</b>                 | 2            | 12.0                   | 12.0                      | 42.5                   | 42.5                   |
| <b>CHM</b>                | 1            | 10.0                   | 10.0                      | 62.0                   | 62.0                   |
| <b>RP</b>                 | 12           | 19.7                   | 18.0                      | 59.1                   | 65.0                   |
| <b>CRD</b>                | 14           | 15.6                   | 11.0                      | 49.9                   | 48.0                   |
| <b>PD</b>                 | 10           | 12.9                   | 5.0                       | 50.1                   | 51.0                   |
